# Supplementary material
Source: publisher site journal article supplement (https://en-cdn.bio-protocol.org/attached/file/20171120/Supplemental%20Table%20S1.docx)
Supplement: Supplementary file 1 [file Supplemental%20Table%20S1.docx]

**Table S1. Representative data from a single experiment of SPM using soft agar overlay for the *hisC* gene in strain *B. subtilis* YB955**

|  | **# of His+ colonies** | | |  |  |
| --- | --- | --- | --- | --- | --- |
| **Day, after overlay** | **Plate 1** | **Plate 2** | **Average** | **Accumulated** | ***Revertants/107 cells** |
| 2 | 0 | 1 | 0.5 | 0.5 | 0.038461538 |
| 4 | 9 | 14 | 11.5 | 12 | 0.923076923 |
| 6 | 4 | 8 | 6 | 18 | 1.384615385 |
| 8 | 16 | 16 | 16 | 34 | 2.615384615 |
| 10 | 24 | 36 | 30 | 64 | 4.923076923 |
|  |  |  |  |  |  |
|  | Cell count/100 µl = 13 x 107 cells | | | |  |

**Note: The experiments are repeated at least two times, for each strain and tested gene. The three independent experiments are averaged and the standard deviation is calculated.*
